# Supplementary material
Source: MDPI journal article supplement (https://www.mdpi.com/1424-2818/14/5/341)
Supplement: s1 [file s1]

Supplementary Table S1. Model selection results for forest bird communities residing in different habitat types and different phenophases. Wi is the Akaike's weight.

| Resi_parks     | No. | Wood | Noise     | Tree_Spe  | LPIWood       | FHD       | %Wood_2b | Herb_Spe | delta | Wi   | adjR <sup>2</sup> | p    |
|----------------|-----|------|-----------|-----------|---------------|-----------|----------|----------|-------|------|-------------------|------|
| Spe_<br>Breed  | 1   | 0.50 | -0.28     | 0.49      |               |           |          |          | 0.00  | 0.47 | 0.76              | 0.00 |
|                | 2   | 0.65 |           |           |               |           |          | 0.41     | 0.59  | 0.35 | 0.72              | 0.00 |
|                | 3   | 0.61 |           | 0.41      |               |           |          |          | 1.88  | 0.18 | 0.70              | 0.00 |
| Ind_ Breed     | 1   | 0.48 |           |           |               | 0.41      |          | 0.51     | 0.00  | 0.65 | 0.83              | 0.00 |
|                | 2   | 0.47 |           |           | 0.19          | 0.29      |          | 0.46     | 1.20  | 0.36 | 0.85              | 0.00 |
| Spe_<br>Wint   | 1   | 0.66 |           |           |               |           | 0.43     |          | 0.00  | 0.67 | 0.64              | 0.00 |
|                | 2   | 0.62 | -0.20     |           |               |           | 0.39     |          | 1.41  | 0.33 | 0.67              | 0.00 |
| Ind_<br>Wint   | 1   | 1.61 | -0.21     |           |               |           |          |          | 0.00  | 0.71 | 0.80              | 0.00 |
|                | 2   | 1.67 |           |           |               |           |          |          | 1.83  | 0.29 | 0.84              | 0.00 |
| Muni_parks     |     | Wood | Noise     | Tree_Spe  | LPIWood       | FHD       | Tree_Cov |          | delta | Wi   | adjR <sup>2</sup> | p    |
| Spe_<br>Breed  | 1   | 0.60 |           |           |               |           | 0.38     |          | 0.00  | 0.43 | 0.59              | 0.00 |
|                | 2   | 0.73 |           |           |               |           |          |          | 0.38  | 0.36 | 0.49              | 0.00 |
|                | 3   | 0.57 |           |           |               | 0.34      |          |          | 1.48  | 0.21 | 0.55              | 0.01 |
| Ind_ Breed     | 1   | 0.63 |           |           |               |           |          |          | 0.00  | 1.00 | 0.34              | 0.02 |
| Spe_<br>Wint   | 1   |      |           | 0.48      |               | 0.60      |          |          | 0.00  | 1.00 | 0.57              | 0.00 |
| Ind_<br>Wint   | 1   |      |           |           |               | 0.55      |          |          | 0.00  | 0.22 | 0.23              | 0.05 |
|                | 2   |      |           | 0.46      |               | 0.50      |          |          | 0.24  | 0.20 | 0.39              | 0.04 |
|                | 3   |      |           | 0.52      |               |           |          |          | 0.99  | 0.14 | 0.17              | 0.09 |
|                | 4   |      |           | 0.55      |               |           | 0.50     |          | 1.02  | 0.13 | 0.35              | 0.05 |
|                | 5   |      |           |           |               |           |          |          | 1.13  | 0.13 | NA                | NA   |
|                | 6   |      | 0.48      |           |               |           |          |          | 1.40  | 0.11 | 0.15              | 0.11 |
|                | 7   |      |           |           |               |           | 0.46     |          | 2.00  | 0.08 | 0.11              | 0.15 |
| Resi_comm      |     | Wood | Shrub_Spe | Shrub_Cov | CoheWood_1kmb | FHD       | Tree_Cov | Herb_Spe | delta | Wi   | adjR <sup>2</sup> | p    |
| Spe_ Breed     | 1   | 0.55 |           | 0.41      |               |           |          |          | 0.00  | 1.00 | 0.62              | 0.00 |
|                | 1   |      |           | 0.43      |               |           |          |          | 0.00  | 0.25 | 0.13              | 0.08 |
|                | 2   |      |           |           |               | 0.42      |          |          | 0.24  | 0.23 | 0.12              | 0.10 |
| Ind_ Breed     | 3   |      |           |           |               |           |          |          | 0.50  | 0.20 | NA                | NA   |
|                | 4   |      |           | 0.37      |               | 0.36      |          |          | 0.66  | 0.18 | 0.21              | 0.07 |
|                | 5   | 0.36 |           |           |               |           |          |          | 1.16  | 0.14 | 0.07              | 0.16 |
| Spe_<br>Wint   | 1   | 0.41 | 0.38      |           |               | 0.39      | 0.44     |          | 0.00  | 1.00 | 0.83              | 0.00 |
| Ind_<br>Wint   | 1   | 0.43 |           |           |               | 0.37      |          | 0.41     | 0.00  | 0.31 | 0.66              | 0.00 |
|                | 2   |      |           |           |               | 0.37      | 0.51     | 0.49     | 0.73  | 0.22 | 0.59              | 0.00 |
|                | 3   | 0.33 |           |           |               | 0.27      | 0.40     | 0.42     | 1.31  | 0.16 | 0.66              | 0.00 |
|                | 4   | 0.57 |           |           |               |           |          | 0.37     | 1.33  | 0.16 | 0.50              | 0.00 |
|                | 5   | 0.61 |           |           |               |           | 0.31     | 0.41     | 1.38  | 0.16 | 0.58              | 0.00 |
| Traf_<br>green |     | Wood | Visitors  | Tree_Spe  | LPIWood_1kmb  | Wood_1kmb | Tree_Cov |          | delta | Wi   | adjR <sup>2</sup> | p    |

|       |   |       |      |      |      |      |      |      |      |
|-------|---|-------|------|------|------|------|------|------|------|
| Spe_  | 1 | -0.63 |      |      | 0.67 | 0.00 | 1.00 | 0.57 | 0.00 |
| Breed |   |       |      |      |      |      |      |      |      |
| Ind_  | 1 | -0.50 |      |      | 0.71 | 0.00 | 1.00 | 0.51 | 0.01 |
| Breed |   |       |      |      |      |      |      |      |      |
|       | 1 |       | 0.58 |      |      | 0.00 | 0.34 | 0.28 | 0.02 |
| Spe_  | 2 | 0.57  |      |      |      | 0.06 | 0.33 | 0.28 | 0.03 |
| Wint  | 3 |       |      | 0.53 |      | 1.16 | 0.19 | 0.22 | 0.04 |
|       | 4 | 0.58  |      | 0.29 |      | 1.91 | 0.13 | 0.31 | 0.04 |
| Ind_  | 1 | 0.76  |      |      |      | 0.00 | 0.52 | 0.55 | 0.00 |
| Wint  | 2 | 0.76  | 0.26 |      |      | 1.20 | 0.29 | 0.59 | 0.00 |
|       | 3 |       | 0.45 | 0.78 |      | 1.93 | 0.20 | 0.57 | 0.00 |

“Spe” represents species richness, “Ind” represents species abundance, “Cov” represents coverage, “Breed” represents breeding season, “Wint” represents wintering season, “Visitors” represents number of people.

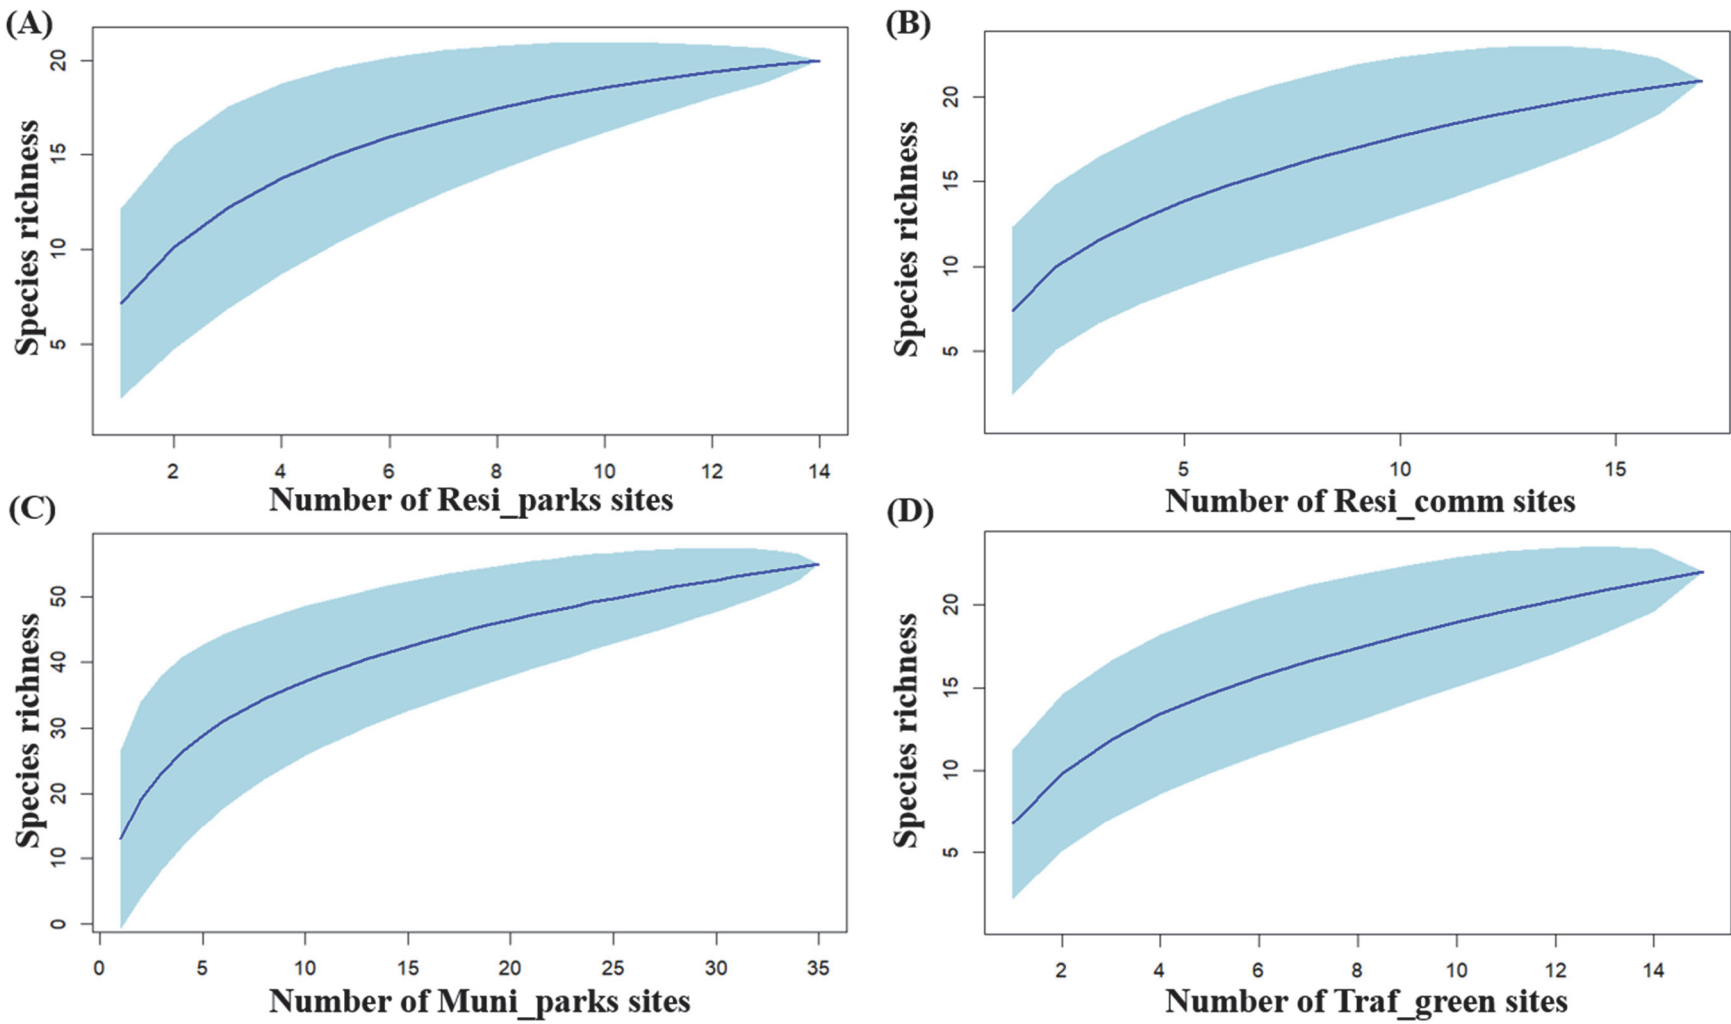

Supplementary Figure S1. Species accumulation curves in different types of urban green spaces. Accumulation method: random, with 100 permutations.
